# Supplementary material
Source: publisher site journal article supplement (https://www.dovepress.com/article/343489)

**FigS1. Distribution of proportion of anti-infection programs**


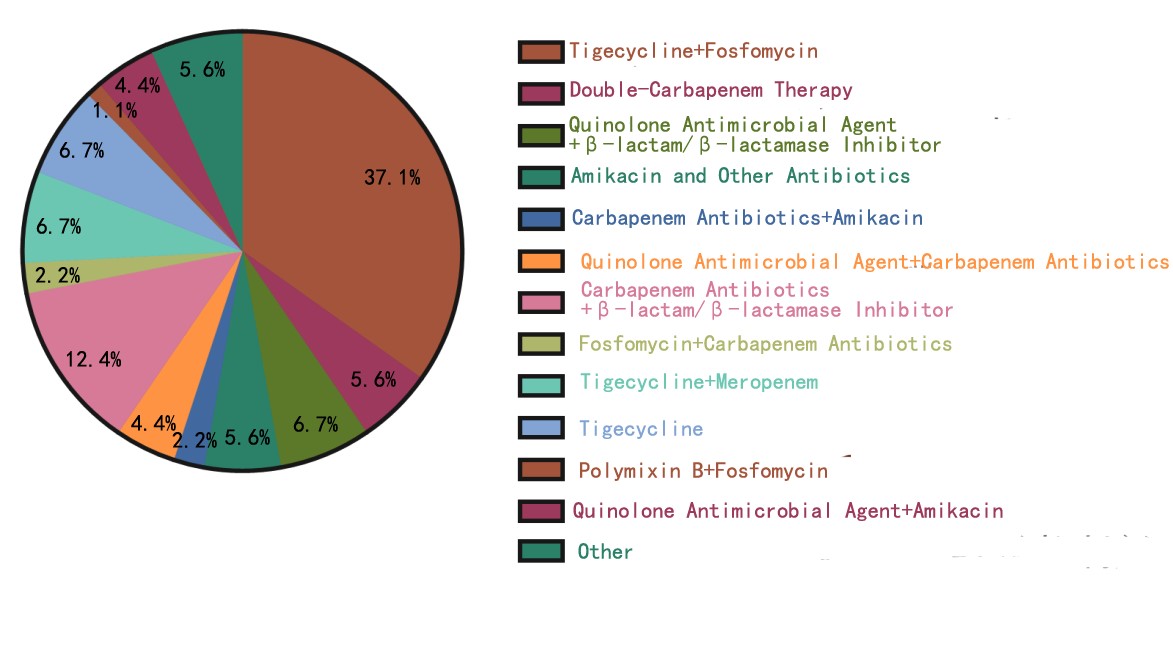


**FigS2.Comparison of APACHE II score between survival group and non-survival group**


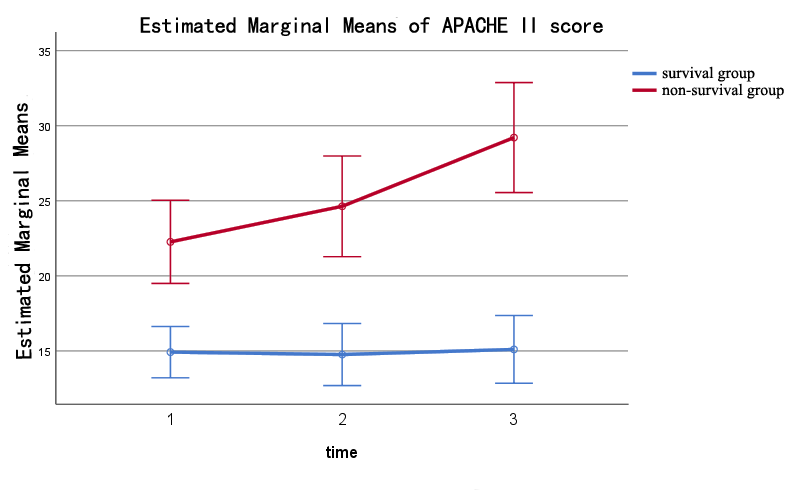


**FigS3. Comparison of lactate between survival group and non-survival group**


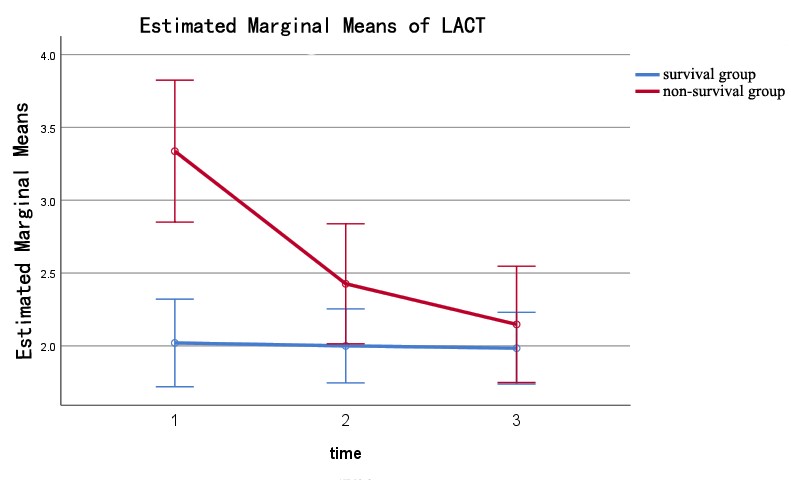

Supplement: Supplementary file 1 [file get_supplementary_file.php]
